# Supplementary material for: Multifunctional tryptophan-based fluorescent polymeric probes for sensing, bioimaging and removal of Cu2+ and Hg2+ ions
Source: Royal Society of Chemistry journal article supplement (doi:10.1039/c9py01892a), 2020-01-01
Supplement: c9py01892a1.pdf [file c9py01892a1.pdf]

## Supporting Information

### Multifunctional Tryptophan-Based Fluorescent Polymeric Probes for Sensing, Bioimaging and Removal of $\text{Cu}^{2+}$ and $\text{Hg}^{2+}$ Ions

Neha Choudhury,<sup>a,b</sup> Bhuban Ruidas,<sup>d</sup> Biswajit Saha,<sup>a,b</sup> Kambalapalli Srikanth,<sup>c</sup> Chitrangada Das Mukhopadhyay<sup>d</sup> and Priyadarsi De<sup>a,b,c\*</sup>

<sup>a</sup>Polymer Research Centre, <sup>b</sup>Department of Chemical Sciences, <sup>c</sup>Centre for Advanced Functional Materials, Indian Institute of Science Education and Research Kolkata, Mohanpur - 741246, Nadia, West Bengal, India.

<sup>d</sup>Centre for Healthcare Science and Technology, Indian Institute of Engineering Science and Technology, Shibpur, P.O. Botanic Garden, Howrah, West Bengal, 711103, India

\* Corresponding Author: E-mail: p\_de@iiserkol.ac.in

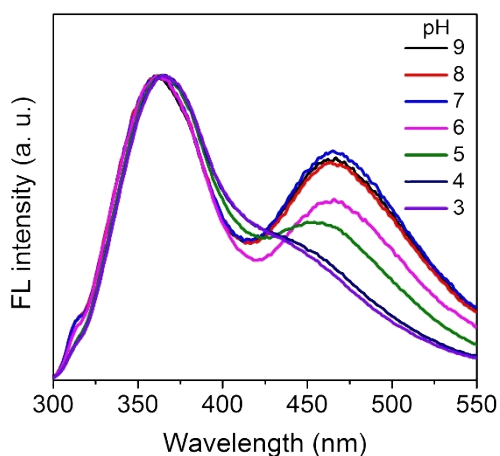

**Figure S1.** Change in the fluorescence intensity of **CP3** ( $10^{-4}$  M) at different pH.

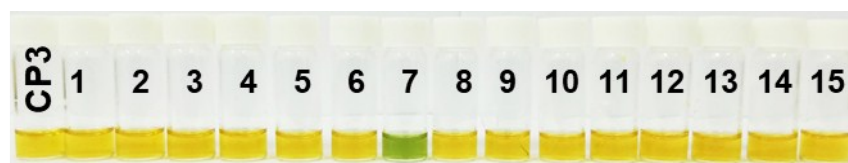

**Figure S2.** Color of **CP3** solution upon treatment with several interfering cations: 1 ( $\text{Mg}^{2+}$ ), 2 ( $\text{As}^{3+}$ ), 3 ( $\text{Zn}^{2+}$ ), 4 ( $\text{Mn}^{2+}$ ), 5 ( $\text{Na}^{+}$ ), 6 ( $\text{Hg}^{2+}$ ), 7 ( $\text{Cu}^{2+}$ ), 8 ( $\text{K}^{+}$ ), 9 ( $\text{Cd}^{2+}$ ), 10 ( $\text{Ni}^{2+}$ ), 11 ( $\text{Ca}^{2+}$ ), 12 ( $\text{Co}^{2+}$ ), 13 ( $\text{Cr}^{3+}$ ), 14 ( $\text{Fe}^{2+}$ ), 15 ( $\text{Fe}^{3+}$ ).

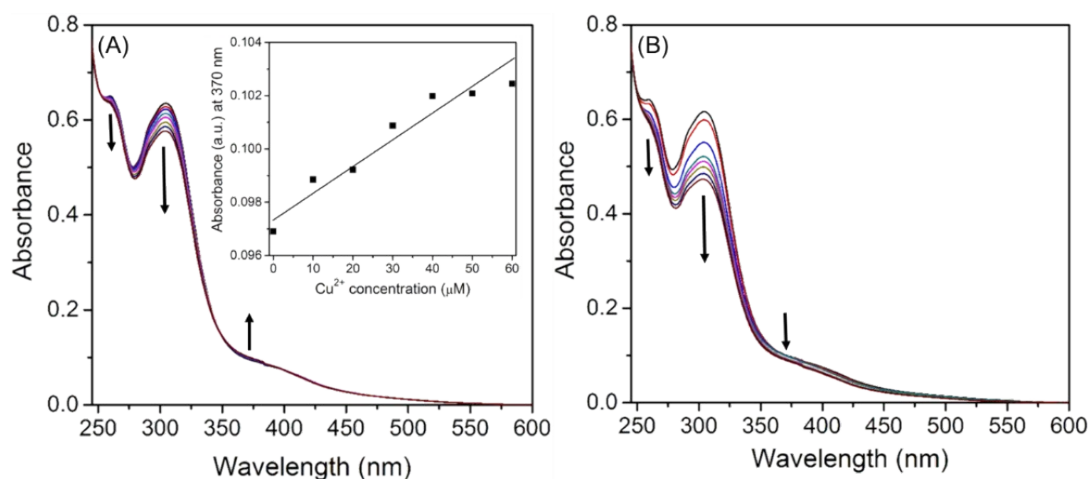

**Figure S3.** UV-vis titration of **CP3** with (A)  $\text{Cu}^{2+}$  (inset shows the enhancement of absorbance at 370 nm upon addition of metal ion) and (B)  $\text{Hg}^{2+}$  ions in water.

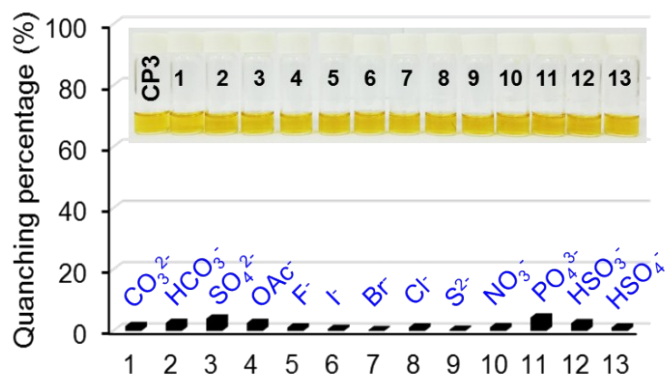

**Figure S4.** Bar diagram representation of fluorescence quenching of **CP3** upon treatment with several interfering anions.

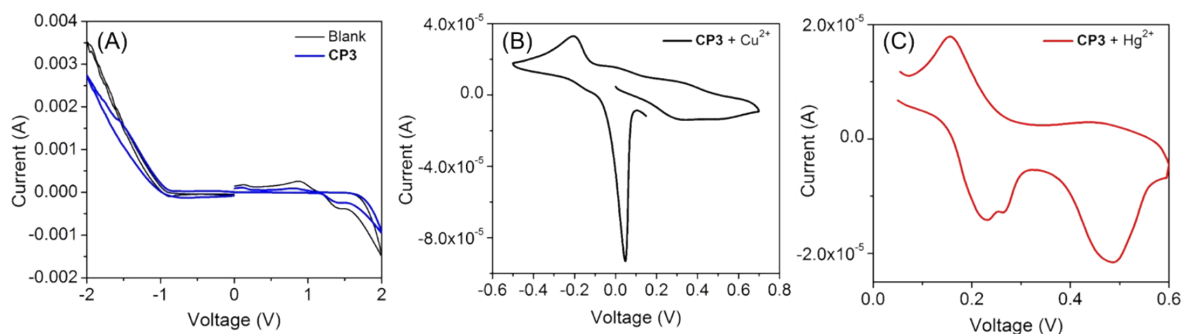

**Figure S5.** Cyclic voltammogram of **CP3**, **CP3•Cu<sup>2+</sup>** complex, and **CP3•Hg<sup>2+</sup>** complex in H<sub>2</sub>O containing 0.1 M KCl, using Pt disk as a working electrode, Pt wire as the counter electrode and Ag/AgNO<sub>3</sub> as the reference electrode, scan rate 100 mV/s.

**Table S1.** Fluorescence lifetime of **CP3** with and without treatment with Cu<sup>2+</sup>/ Hg<sup>2+</sup>.<sup>a</sup>

| Compound                     | $\alpha_1$ | $\alpha_2$ | $\tau_1$<br>(ns) | $\tau_2$<br>(ns) | $\langle \tau \rangle^b$<br>(ns) |
|------------------------------|------------|------------|------------------|------------------|----------------------------------|
| <b>CP3</b>                   | 19.90      | 80.10      | 2.56             | 12.91            | 12.42                            |
| <b>CP3 + Cu<sup>2+</sup></b> | 44.08      | 55.92      | 2.59             | 9.98             | 10.46                            |
| <b>CP3 + Hg<sup>2+</sup></b> | 41.11      | 58.89      | 0.70             | 5.40             | 5.58                             |

<sup>a</sup>The data were fitted with a biexponential decay equation. <sup>b</sup>The average lifetime was

calculated using the following formula:  $\langle \tau \rangle = \frac{\alpha_1 \tau_1^2 + \alpha_2 \tau_2^2}{\alpha_1 \tau_1 + \alpha_2 \tau_2}$

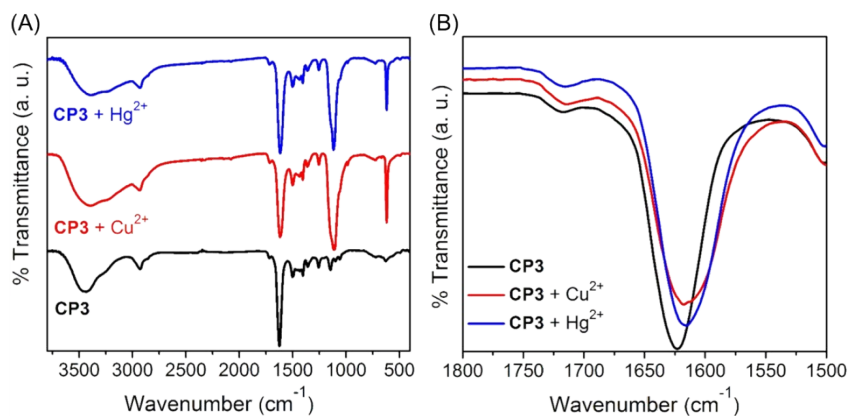

**Figure S6.** IR spectra of **CP3**, **CP3•Cu<sup>2+</sup>** complex, and **CP3•Hg<sup>2+</sup>** complex in methanol (A). Magnified view of the 1500-1800 cm<sup>-1</sup> region (B).

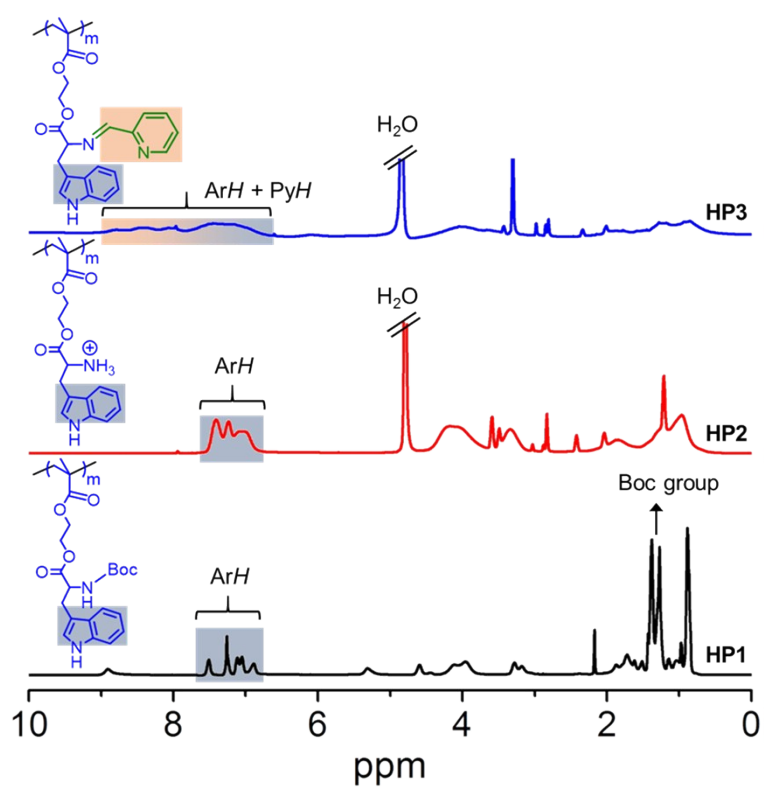

**Figure S7.**  $^1\text{H}$  NMR spectra of **HP1** in  $\text{CDCl}_3$ , **HP2** and **HP3** in  $\text{D}_2\text{O}$ .

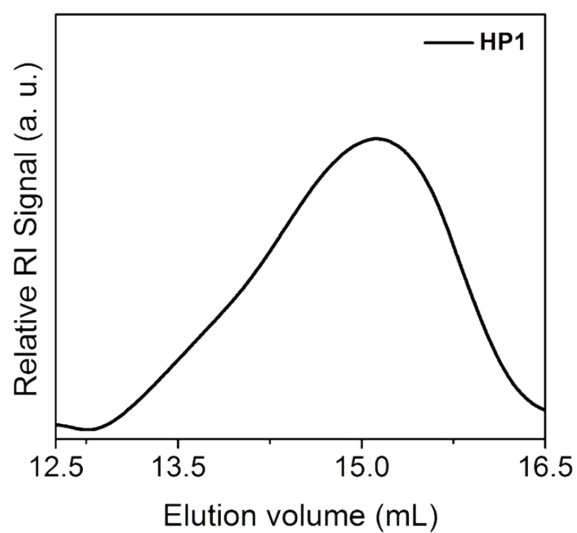

**Figure S8.** SEC RI trace of **HP1** in DMF as eluent.
